# Supplementary material for: Vortex-assisted emulsification microextraction followed by in-syringe ultrasound-assisted back-microextraction to determine haloacetic acids in waters
Source: Royal Society of Chemistry journal article supplement (doi:10.1039/c4ay00432a), 2014-01-01
Supplement: c4ay00432a1.pdf [file c4ay00432a1.pdf]

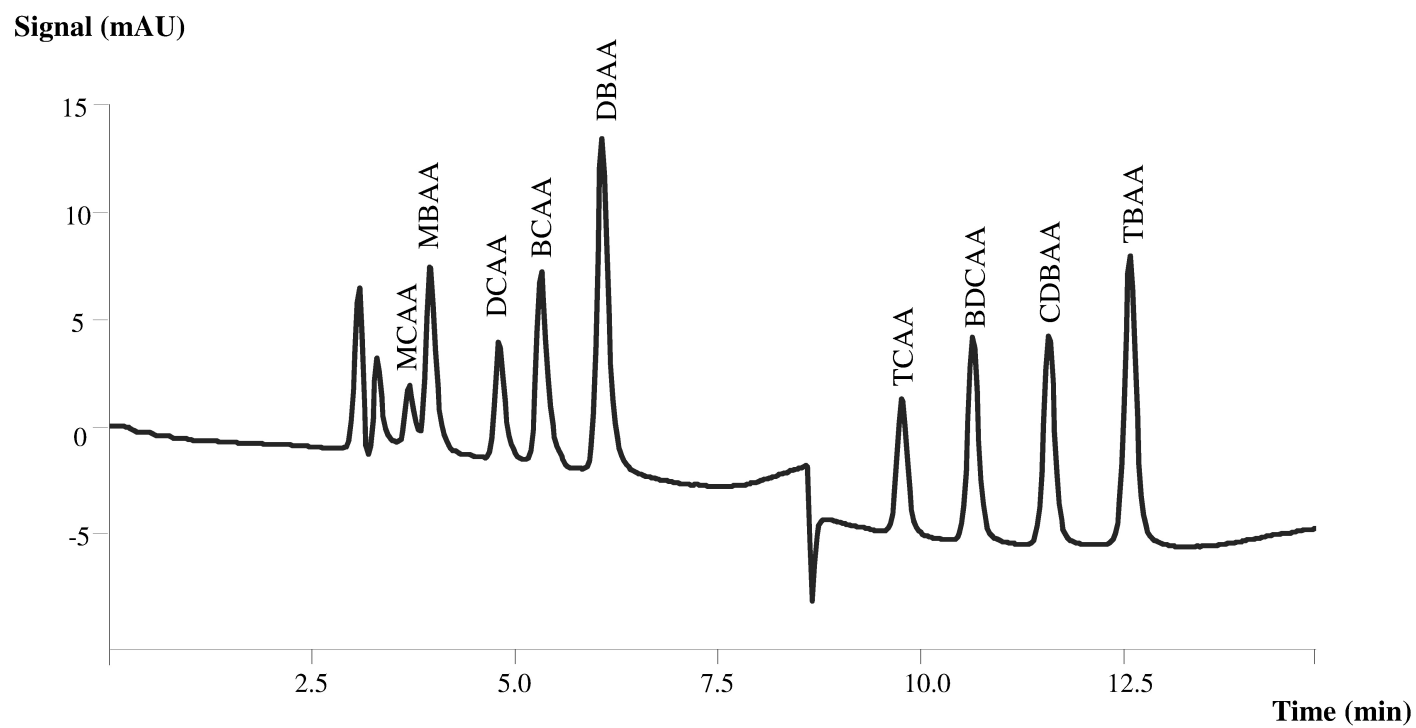

**Fig. S1** Representative chromatogram of a standard mixture of HAAs (with a concentration of  $10 \text{ mg}\cdot\text{L}^{-1}$ ) under optimum conditions.
