# Supplementary material for: Vortex-assisted emulsification microextraction followed by in-syringe ultrasound-assisted back-microextraction to determine haloacetic acids in waters
Source: Royal Society of Chemistry journal article supplement (doi:10.1039/c4ay00432a), 2014-01-01
Supplement: c4ay00432a2.pdf [file c4ay00432a2.pdf]

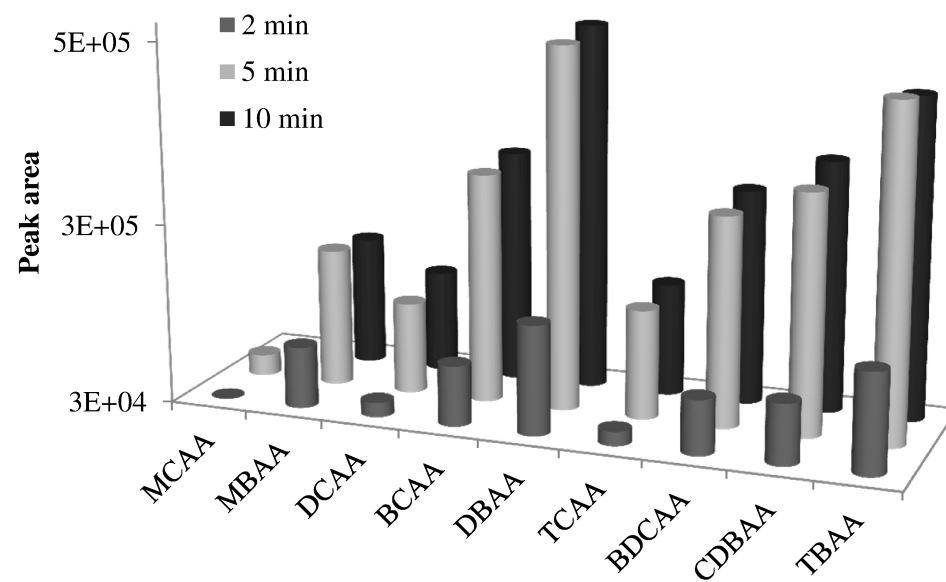

**Fig. S2** Influence of the sonication time on the extraction efficiency (as peak area) of the back-microextraction when using isopropyl ether (100  $\mu$ L). The spiked concentrations of HAAs were 5  $\text{mg}\cdot\text{L}^{-1}$ .
