# Supplementary material for: Vortex-assisted emulsification microextraction followed by in-syringe ultrasound-assisted back-microextraction to determine haloacetic acids in waters
Source: Royal Society of Chemistry journal article supplement (doi:10.1039/c4ay00432a), 2014-01-01
Supplement: c4ay00432a3.pdf [file c4ay00432a3.pdf]

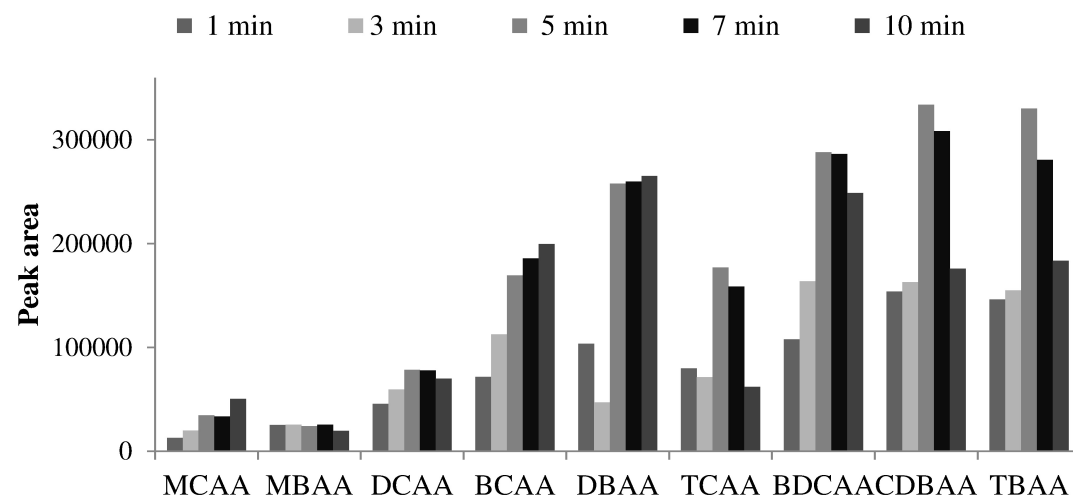

**Fig. S3** Effect of the vortex in the overall VAEME method followed by the back-microextraction (1:1 ratio) when using isopropyl ether as the extractant solvent
