# Supplementary material for: Vortex-assisted emulsification microextraction followed by in-syringe ultrasound-assisted back-microextraction to determine haloacetic acids in waters
Source: Royal Society of Chemistry journal article supplement (doi:10.1039/c4ay00432a), 2014-01-01
Supplement: c4ay00432a4.pdf [file c4ay00432a4.pdf]

**Table S1** Quality analytical parameters of the chromatographic calibrations for the HAAs studied. The calibration range varied from 0.125 to 10 mg·L<sup>-1</sup> for MBAA and DBAA, from 0.5 to 10 mg·L<sup>-1</sup> for MCAA, and from 0.25 to 10 mg·L<sup>-1</sup> for the remaining HAAs.

| HAAs  | Retention time          | Slope ±                           | Intercept ±                       | R      | LOD <sup>c</sup> (µg·L <sup>-1</sup> ) | LOQ <sup>c</sup> (µg·L <sup>-1</sup> ) | RSD <sup>d</sup> (%) |                      |
|-------|-------------------------|-----------------------------------|-----------------------------------|--------|----------------------------------------|----------------------------------------|----------------------|----------------------|
|       | (min) ± SD <sup>a</sup> | t <sub>n-2</sub> ×SD <sup>b</sup> | t <sub>n-2</sub> ×SD <sup>b</sup> |        |                                        |                                        | 2 mg·L <sup>-1</sup> | 8 mg·L <sup>-1</sup> |
| MCAA  | 3.65 ± 0.02             | 11429 ± 287                       | 2002 ± 1366                       | 0.9993 | 238                                    | 791                                    | 3.03                 | 2.90                 |
| MBAA  | 3.93 ± 0.04             | 45850 ± 591                       | 1421 ± 2880                       | 0.9996 | 200                                    | 668                                    | 1.79                 | 1.40                 |
| DCAA  | 4.79 ± 0.06             | 29791 ± 570                       | -6688 ± 2502                      | 0.9991 | 36.2                                   | 120                                    | 0.67                 | 0.42                 |
| BCAA  | 5.32 ± 0.02             | 56071 ± 490                       | -2346 ± 2115                      | 0.9998 | 75.0                                   | 250                                    | 1.84                 | 0.85                 |
| DBAA  | 6.07 ± 0.03             | 92067 ± 437                       | -5885 ± 1796                      | 0.9999 | 17.9                                   | 59.6                                   | 1.82                 | 0.54                 |
| TCAA  | 9.75 ± 0.04             | 39467 ± 574                       | -9578 ± 2372                      | 0.9996 | 172                                    | 574                                    | 2.42                 | 0.75                 |
| BDCAA | 10.2 ± 0.04             | 59131 ± 1290                      | 4786 ± 6061                       | 0.9988 | 104                                    | 348                                    | 4.75                 | 2.54                 |
| CDBAA | 11.6 ± 0.06             | 53613 ± 1521                      | -13296 ± 7696                     | 0.9985 | 56.8                                   | 189                                    | 1.53                 | 1.57                 |
| TBAA  | 12.6 ± 0.06             | 67270 ± 1893                      | 5111 ± 9236                       | 0.9983 | 29.0                                   | 96.8                                   | 2.94                 | 1.39                 |

<sup>a</sup>standard deviation of the retention times (n = 30)

<sup>b</sup>confidence level ( $\alpha = 0.05$ ) for n = 13, except MCAA and MBAA with n = 7

<sup>c</sup>calculated as described in the text

<sup>d</sup>n = 6, with concentration levels not utilized in the calibration curve but included in the calibration range
