# Supplementary material for: Vortex-assisted emulsification microextraction followed by in-syringe ultrasound-assisted back-microextraction to determine haloacetic acids in waters
Source: Royal Society of Chemistry journal article supplement (doi:10.1039/c4ay00432a), 2014-01-01
Supplement: c4ay00432a5.pdf [file c4ay00432a5.pdf]

**Table S2** Study of different ratios to improve the preconcentration in the back-microextraction step and so in the overall method.

| HAAs    | Extraction efficiencies for the overall method (%) <sup>a</sup> |           |           |           |
|---------|-----------------------------------------------------------------|-----------|-----------|-----------|
|         | Ratio 1:1                                                       | Ratio 2:1 | Ratio 4:1 | Ratio 8:1 |
| MCAA    | 67.3                                                            | 53.2      | 53.2      | 31.1      |
| MBAA    | 67.0                                                            | 55.9      | 45.3      | 26.5      |
| DCAA    | 78.5                                                            | 44.1      | 48.7      | 31.5      |
| BCAA    | 65.9                                                            | 50.8      | 52.1      | 36.5      |
| DBAA    | 76.1                                                            | 46.3      | 45.1      | 30.2      |
| TCAA    | 68.5                                                            | 22.4      | 24.0      | 17.8      |
| BDCAA   | 74.0                                                            | 48.8      | 47.7      | 35.9      |
| CDBAA   | 95.6                                                            | 43.1      | 48.7      | 37.0      |
| TBAA    | 90.8                                                            | 78.7      | 72.9      | 50.5      |
| Average | 75.9                                                            | 49.3      | 48.6      | 33.0      |

<sup>a</sup>HAAs concentration: 5 mg·L<sup>-1</sup> (n = 2)
